# Supplementary material for: Short Length of Stay After Elective Transfemoral Transcatheter Aortic Valve Replacement is Not Associated With Increased Early or Late Readmission Risk
Source: PubMed Central journal article supplement — J Am Heart Assoc. 2017 Apr 24;6(4):e005460. doi: 10.1161/JAHA.116.005460 (PMC5533033; doi:10.1161/jaha.116.005460), 2017-04-24
Supplement: JAH3-6-e005460-s001.pdf [file JAH3-6-e005460-s001.pdf]

# **Supplemental Material**

**Table S1. Cardiac disease diagnosis codes**

| <b>Diagnosis</b>       | <b>ICD-9 codes</b> | <b>ICD-10 codes</b>                                   |
|------------------------|--------------------|-------------------------------------------------------|
| Heart failure          | 428                | I099,I255,I420,I425,I426,I427,I428,I429,I43, I50,P290 |
| Ischemic heart disease | 410-414            | I20-I24                                               |
| Myocardial Infarction  | 410                | I21, I22, I252                                        |
| Atrial Fibrillation    | 427.3              | I48                                                   |

ICD- International Classification of Disease

**Table S2. Non-cardiac disease diagnosis codes<sup>1</sup>**

| Diagnosis                             | ICD-9 codes               | ICD-10 codes                                                                                           | OHIP          | ODBD                                                                                                                |
|---------------------------------------|---------------------------|--------------------------------------------------------------------------------------------------------|---------------|---------------------------------------------------------------------------------------------------------------------|
| Peripheral Vascular Disease           | 440-448, 785.4            | I70,I71,I731,I738,I739,I771,I790,I792,K551,K558,K559,Z958,Z959                                         |               |                                                                                                                     |
| Cerebrovascular Disease               | 430-438                   | G45,G46,H340,I60,I61,I62,I63,I64,I65,I66,I67,I68,I69                                                   |               |                                                                                                                     |
| Chronic Obstructive Pulmonary Disease | 410                       | I278,I279,J40,J41,J42,J43, J44,J45, J46, J47, J60, J61, J62, J63, J64, J65, J66, J67, J684, J701, J703 |               |                                                                                                                     |
| Cognitive Impairment / Dementia       | 290.0-290.9, 331.0        | F00,F01,F02,F03,F051, G30,G311,G041,G114, G801,G802,G81,G82,G830,G831,G832,G833,G834,G839              | 290, 331, 797 | Any cholinesterase inhibitor script in ODB during 1 year prior to index, ODB subclnam =: 'CHOLINESTERASE INHIBITOR' |
| Metastatic Cancer                     | 196-199                   | C77-C80                                                                                                |               |                                                                                                                     |
| Non-metastatic Cancer                 | 140-172, 174-195, 200-208 | C0, C1, C20-C26, C30-C34, C37-C41, C43, C45-C58, C6, C70-C76, C81-C85, C88, C90-C97                    |               |                                                                                                                     |

ICD- International Classification of Disease; OHIP- Ontario Health Insurance Plan; ODBD- Ontario Drug Benefits Database

**Table S3. List of codes for Procedures<sup>2, 3</sup>**

| <b>Procedure</b>                                                                                                 | <b>CCI (ICD-10) codes</b>                                                                       | <b>OHIP codes</b>                                                                                                                                                                        | <b>CCP Codes</b>              |
|------------------------------------------------------------------------------------------------------------------|-------------------------------------------------------------------------------------------------|------------------------------------------------------------------------------------------------------------------------------------------------------------------------------------------|-------------------------------|
| Percutaneous coronary intervention                                                                               | 1IJ50, 1IJ54GQAZ, 1IJ57GQ                                                                       | Z434                                                                                                                                                                                     | 48.02, 48.03                  |
| Coronary artery bypass surgery                                                                                   | 1IJ76                                                                                           | R742, R743                                                                                                                                                                               | 48.1                          |
| Mitral Valve Surgery                                                                                             | 1HU80, 1HU90                                                                                    | R734-735                                                                                                                                                                                 | 47.02, 42.12,<br>47.22, 47.23 |
| Tricuspid Valve Surgery                                                                                          | 1HS80                                                                                           | R728                                                                                                                                                                                     | 47.04, 47.14,<br>47.26, 47.27 |
| Aortic Valve Surgery                                                                                             | 1HV80, 1HV90                                                                                    | R738, R863                                                                                                                                                                               | 47.03, 47.13,<br>47.24, 47.25 |
| Pulmonary Valve Surgery                                                                                          | 1HS90, 1HT80 1HT89, 1HT90                                                                       | R772                                                                                                                                                                                     | 47.05, 47.15,<br>47.28, 47.29 |
| Permanent pacemaker implantation                                                                                 | 1HZ53GRNM, 1HZ53LANM,<br>1HZ53GRNK, 1HZ53LANK,<br>1HZ53GRNL, 1HZ53LANL,<br>1HZ53GRFR, 1HZ53LAFR | R752                                                                                                                                                                                     | 49.71                         |
| Implantable cardiac defibrillator                                                                                | 1HZ53GRFS, 1HZ53LAFS                                                                            | R761, R753                                                                                                                                                                               | 49.74                         |
| Chronic Dialysis (2 codes at least 90 days apart but no more than 150 days separating the first and second code) | 1PZ21HQBR<br>1PZ21HPD4                                                                          | R849, R850, G323, G325, G326,<br>G330, G331, G332, G860,<br>G333, G083, G091, G085,<br>G295, G082, G090, G092,<br>G093, G094, G861, G862,<br>G863, G864, G865, G866,<br>G294, G095, G096 | 51.95, 66.98                  |

ICD- International Classification of Disease; CCI- Canadian Classification of Health Interventions; CCP- Canadian Classification of Diagnostic, Therapeutic and Surgical Procedures

**Table S4. In Hospital Complications<sup>1, 3, 4</sup>**

| Diagnosis                                                                                                                                                                                                                                                                                                                                                                         | ICD-9 codes/[CCI Codes]                                                                                                              | ICD-10 codes/[CCP Codes]                                                                                                                                                                                                                                                                                                                                                                                                                                                          | OHIP                                                                                                                                                                                       |
|-----------------------------------------------------------------------------------------------------------------------------------------------------------------------------------------------------------------------------------------------------------------------------------------------------------------------------------------------------------------------------------|--------------------------------------------------------------------------------------------------------------------------------------|-----------------------------------------------------------------------------------------------------------------------------------------------------------------------------------------------------------------------------------------------------------------------------------------------------------------------------------------------------------------------------------------------------------------------------------------------------------------------------------|--------------------------------------------------------------------------------------------------------------------------------------------------------------------------------------------|
| <p><b>Acute Kidney Injury</b></p> <p>A diagnosis code for acute kidney injury with <math>\geq 1</math> code for dialysis during the same hospitalization</p>                                                                                                                                                                                                                      | <p>Acute Kidney Injury<br/>584.5-584.9, 669.3, 958.5 634.3, 635.3, 636.3, 637.3, 638.3, 639.3</p> <p>Dialysis<br/>[51.95, 66.98]</p> | <p>Acute Kidney Injury<br/>N17.0-N17.9, O08.4, T79.5, O90.4</p> <p>Dialysis<br/>[1PZ21HQBR, 1PZ21HPD4]</p>                                                                                                                                                                                                                                                                                                                                                                        | <p>Dialysis<br/>R849, R850, G323, G325, G326, G330, G331, G332, G860, G333, G083, G091, G085, G295, G082, G090, G092, G093, G094, G861, G862, G863, G864, G865, G866, G294, G095, G096</p> |
| <p><b>Bleeding (VARC-2)</b></p> <p>Classify as:</p> <p><b>Life-threatening or Disabling or Major Bleeding</b> = Any bleeding code and <math>\geq 2</math> units of blood transfused (Blood=BTREDBC)<br/>AND<br/>All intracranial bleeding</p> <p><b>Minor Bleeding</b> = Any non-intracranial bleeding code and <math>&lt; 2</math> units of blood transfused (Blood=BTREDBC)</p> |                                                                                                                                      | <p>Gastrointestinal<br/>I850, K226, K250, K252, K254, K256, K 260, K 262, K264, K266, K270, K272, K274, K276, K280, K284, K286, K290, K625, K661, K920, K921, K922</p> <p>Intracranial<br/>I600, I601, I602, I603, I604, I605, I606, I607, I608, I609, I610, I611, I612, I613, I614, I615, I616, I618, I619, I620, I621, I629</p> <p>Urological<br/>N020-029, R310, R311, R318</p> <p>Pulmonary Bleeding<br/>R040, R041, R042, R048, R049</p> <p>Other Bleeding<br/>R58, T810</p> |                                                                                                                                                                                            |

**Stroke/TIA**

362.3, 430, 431, 434, 435, 436

I60, I61, I63 (excluding I63.6), I64,  
H34.0, H34.1, G45 (excluding  
G45.4)

---

ICD- International Classification of Disease; CCI- Canadian Classification of Health Interventions; CCP- Canadian Classification of Diagnostic, Therapeutic and Surgical Procedures; VARC-2 Valve Academic Research Consortium 2; TIA – Transient Ischemic Attack

**Table S5. Cause-specific Readmissions<sup>1</sup>**

| <b>Diagnosis</b>                                   | <b>ICD-9 codes</b>                                        | <b>ICD-10 codes</b>                                       |
|----------------------------------------------------|-----------------------------------------------------------|-----------------------------------------------------------|
| Cardiovascular<br>(primary diagnosis)              | Acute Myocardial Infarction<br>410                        | Acute Myocardial Infarction<br>I21, I22                   |
|                                                    | Stroke<br>430, 431, 434, 436, 362.3                       | Stroke<br>I60, I61, I63 (excluding I63.6), I64, H34.1     |
|                                                    | Heart Failure<br>428                                      | Heart Failure<br>I50                                      |
|                                                    | Hypertension<br>NA                                        | Hypertension<br>I10, I11, I12, I13 or I15                 |
|                                                    | Unstable Angina<br>411, 413                               | Unstable Angina<br>I20                                    |
|                                                    | Ischemic Stroke<br>434, 436, 362.3                        | Ischemic Stroke<br>I63, I64, H34.1 (excluding I63.6)      |
|                                                    | Hemorrhagic Stroke<br>430, 431                            | Hemorrhagic Stroke<br>I60, I61                            |
|                                                    | Transient Ischemic Attack<br>435                          | Transient Ischemic Attack<br>G45 (excluding G45.4), H34.0 |
|                                                    | Atrial Fibrillation<br>427.3                              | Atrial Fibrillation<br>I48                                |
|                                                    | Abdominal Aortic Aneurysm<br>441.3, 441.4                 | Abdominal Aortic Aneurysm<br>I71.3, I71.4                 |
| Peripheral Arterial Disease<br>440.2, 443.9, 444.2 | Peripheral Arterial Disease<br>I70.2, I73.9, I74.3, I74.4 |                                                           |
| Non-cardiovascular                                 | Not meeting criteria for Cardiovascular readmission       |                                                           |

ICD- International Classification of Disease

**Table S6. Comparison Between Patients Surviving to Discharge and Dying In-hospital**

| Baseline And Procedural Characteristics              | Survived Hospitalization<br>(N=709) | Died In Hospital<br>(N=27) | p-value |
|------------------------------------------------------|-------------------------------------|----------------------------|---------|
| <b>Demographic Characteristics</b>                   |                                     |                            |         |
| Age, median, yrs (IQR)                               | 84 (79-87)                          | 86 (84-89)                 | 0.061   |
| Female, n (%)                                        | 300 (42.3%)                         | 16 (59.3%)                 | 0.081   |
| Socioeconomic Status                                 |                                     |                            |         |
| 1st Quintile (lowest)                                | 124 (17.5%)                         | 0 (0.0%)                   | 0.553   |
| 2nd Quintile                                         | 135 (19.0%)                         | SC                         |         |
| 3rd Quintile                                         | 138 (19.5%)                         | SC                         |         |
| 4th Quintile                                         | 149 (21.0%)                         | 6 (22.2%)                  |         |
| 5th Quintile (highest)                               | 159 (22.4%)                         | SC                         |         |
| Missing                                              | SC                                  | 9 (33.3%)                  |         |
| <b>Cardiac History</b>                               |                                     |                            |         |
| Prior Myocardial Infarction, n (%)                   | 224 (31.6%)                         | 7 (25.9%)                  | 0.533   |
| Ischemic Heart Disease, n (%)                        | 514 (72.5%)                         | 19 (70.4%)                 | 0.808   |
| History of Heart Failure, n (%)                      | 632 (89.1%)                         | 21 (77.8%)                 | 0.067   |
| Heart Failure Hospitalization within 90 days         | 127 (17.9%)                         | SC                         | 0.936   |
| New York Heart Association Class                     |                                     |                            |         |
| I and II                                             | 107 (15.1%)                         | SC                         | 0.303   |
| III and IV                                           | 474 (66.8%)                         | 15 (55.6%)                 |         |
| Missing                                              | 128 (18.1%)                         | SC                         |         |
| Left Ventricular Ejection Fraction, n (%)            |                                     |                            |         |
| ≤50%                                                 | 183 (25.8%)                         | SC                         | 0.031   |
| >50%                                                 | 514 (72.5%)                         | 22 (81.5%)                 |         |
| Missing                                              | 12 (1.7%)                           | SC                         |         |
| Prior Cardiac Surgery, n (%)                         |                                     |                            |         |
| Coronary Artery Bypass Grafting                      | 244 (34.4%)                         | SC                         | 0.034   |
| Aortic Valve Replacement                             | 65 (9.2%)                           | SC                         | 0.329   |
| Mitral Valve Replacement or Repair                   | 16 (2.3%)                           | 0 (0.0%)                   | 0.430   |
| Tricuspid Valve Replacement or Repair                | SC                                  | 0 (0.0%)                   | 0.782   |
| History of Percutaneous Coronary Intervention, n (%) | 247 (34.8%)                         | 10 (37.0%)                 | 0.814   |
| History of Implantable Cardiac Defibrillator, n (%)  | 12 (1.7%)                           | 0 (0.0%)                   | 0.496   |

|                                                      |             |            |       |
|------------------------------------------------------|-------------|------------|-------|
| History of Permanent Pacemaker, n (%)                | 87 (12.3%)  | SC         | 0.857 |
| Atrial Fibrillation/Flutter, n (%)                   | 228 (32.2%) | 10 (37.0%) | 0.595 |
| <b>Co-morbid Non-cardiac Conditions</b>              |             |            |       |
| Diabetes, n (%)                                      | 326 (46.0%) | 11 (40.7%) | 0.592 |
| Hypertension, n (%)                                  | 678 (95.6%) | 26 (96.3%) | 0.867 |
| Hyperlipidemia, n (%)                                | 510 (71.9%) | 15 (55.6%) | 0.065 |
| Peripheral Vascular Disease, n (%)                   | 90 (12.7%)  | SC         | 0.376 |
| Cerebrovascular Disease, n (%)                       | 126 (17.8%) | SC         | 0.372 |
| Chronic Obstructive Pulmonary Disease, n (%)         | 104 (14.7%) | 8 (29.6%)  | 0.034 |
| History of Cancer, n (%)                             | 55 (7.8%)   | SC         | 0.947 |
| Cognitive Impairment / Dementia, n (%)               | 12 (1.7%)   | 0 (0.0%)   | 0.496 |
| Dialysis, n (%)                                      | 23 (3.2%)   | SC         | 0.895 |
| Frailty, n (%)                                       | 138 (19.5%) | 6 (22.2%)  | 0.723 |
| <b>Pre-procedural Blood Work</b>                     |             |            |       |
| Serum Creatinine, n (%)                              |             |            |       |
| < 120 µmol/L                                         | 486 (68.5%) | 6 (22.2%)  | 0.092 |
| 120 - 200 µmol/L                                     | 143 (20.2%) | 14 (51.9%) |       |
| ≥ 200 µmol/L                                         | 31 (4.4%)   | SC         |       |
| Missing                                              | 49 (6.9%)   | SC         |       |
| Hemoglobin Status, n (%)                             |             |            |       |
| Anemia*                                              | 448 (63.2%) | 14( 51%)   | 0.150 |
| Missing                                              | 68 (9.6%)   | 6 (22.2%)  |       |
| <b>Pre-procedural Echocardiographic Parameters</b>   |             |            |       |
| Mean transvalvular gradient, mean, mmHg, (SD)†       | 46 (15)     | 46 (16)    | 0.873 |
| <b>Pre-procedural Risk Score</b>                     |             |            |       |
| Society of Thoracic Surgeons Score, mean, %, (SD)‡   | 13 (12)     | 18 (11)    | 0.162 |
| <b>Procedural Characteristics</b>                    |             |            |       |
| Year of Transfemoral Aortic Valve Replacement, n (%) |             |            |       |
| 2007                                                 | 9 (1.3%)    | SC         | 0.934 |
| 2008                                                 | 11 (1.6%)   | 0 (0.0%)   |       |

|                        |             |            |       |
|------------------------|-------------|------------|-------|
| 2009                   | 39 (5.5%)   | SC         |       |
| 2010                   | 72 (10.2%)  | SC         |       |
| 2011                   | 132 (18.6%) | SC         |       |
| 2012                   | 147 (20.7%) | SC         |       |
| 2013                   | 228 (32.2%) | 8 (29.6%)  |       |
| 2014                   | 71 (10.0%)  | SC         |       |
| Prosthesis Type, n (%) |             |            |       |
| Edwards Sapien         | 312 (44.0%) | 11 (40.7%) | <.001 |
| Corevalve              | 368 (51.9%) | 11 (40.7%) |       |
| Missing                | 24 (3.4%)   | SC         |       |
| Other                  | SC          | SC         |       |
| Valve-in-valve, n (%)  | 33 (4.7%)   | SC         | 0.817 |

\*Men < 140 g/L and Female < 120 g/L

† n=90 (12.5%) missing

‡ n=458 (64.6%) missing

IQR: interquartile range, SD: standard deviation

SC indicates small cell, in which patient numbers  $\leq 5$  and cannot be released due to privacy regulations

**Table S7. Effect Estimates of Baseline Predictor Variables Used in Multivariable Models**

| Variable                                                    | 30-day All-Cause Readmission |         | 1-Year All-Cause Readmission |         |
|-------------------------------------------------------------|------------------------------|---------|------------------------------|---------|
|                                                             | Hazard Ratio (95% CI)        | p-value | Hazard Ratio (95% CI)        | p-value |
| Age (per year)                                              | 1.03 (1.00 - 1.06)           | 0.084   | 1.01 (0.99 - 1.03)           | 0.246   |
| Female                                                      | 0.71 (0.16 - 1.26)           | 0.221   | 0.85 (0.56 - 1.14)           | 0.278   |
| Pre-existing Frailty                                        | 1.23 (0.94 - 1.52)           | 0.155   | 1.23 (1.06 - 1.40)           | 0.015   |
| LVEF > 50% *                                                | 1.17 (0.47 - 1.87)           | 0.659   | 1.08 (0.76 - 1.04)           | 0.632   |
| Pre-existing Peripheral Vascular Disease                    | 1.27 (0.85 - 1.69)           | 0.259   | 1.10 (0.92 - 1.28)           | 0.329   |
| Pre-existing Cerebrovascular Disease                        | 1.21 (0.83 - 1.59)           | 0.326   | 1.01 (0.82 - 1.20)           | 0.957   |
| Pre-existing Chronic Obstructive Pulmonary Disease          | 1.16 (0.72 - 1.60)           | 0.513   | 1.48 (1.19 - 1.77)           | 0.007   |
| Creatinine < 120 µmol/L †                                   | 1.37 (0.81 - 1.93)           | 0.274   | 0.76 (0.44 - 1.08)           | 0.099   |
| Heart Failure Hospitalization within 90 days                | 1.80 (1.48 - 2.12)           | 0.000   | 1.18 (0.88 - 1.48)           | 0.286   |
| Year of Transcatheter Aortic Valve Replacement (per year) ‡ | 0.90 (0.75 - 0.05)           | 0.168   | 0.95 (0.89 - 1.01)           | 0.108   |
| Post-procedural Warfarin Use                                | -                            | -       | 1.30 (1.00 - 1.60)           | 0.089   |

CI: confidence interval

\* reference LVEF ≤ 50%, † reference creatinine ≥120 µmol/L ‡ reference year 2007

## Supplemental References:

1. Tu JV, Chu A, Donovan LR, Ko DT, Booth GL, Tu K, Maclagan LC, Guo H, Austin PC, Hogg W, Kapral MK, Wijesundera HC, Atzema CL, Gershon AS, Alter DA, Lee DS, Jackevicius CA, Bhatia RS, Udell JA, Rezai MR, Stukel TA. The cardiovascular health in ambulatory care research team (canheart): Using big data to measure and improve cardiovascular health and healthcare services. *Circ Cardiovasc Qual Outcomes*. 2015;8:204-212.
2. Lee DS, Stitt A, Wang X, Yu JS, Gurevich Y, Kingsbury KJ, Austin PC, Tu JV. Administrative hospitalization database validation of cardiac procedure codes. *Med Care*. 2013;51:e22-26.
3. Wald R, Quinn RR, Luo J, Li P, Scales DC, Mamdani MM, Ray JG, University of Toronto Acute Kidney Injury Research G. Chronic dialysis and death among survivors of acute kidney injury requiring dialysis. *JAMA*. 2009;302:1179-1185.
4. Ko DT, Yun L, Wijesundera HC, Jackevicius CA, Rao SV, Austin PC, Marquis JF, Tu JV. Incidence, predictors, and prognostic implications of hospitalization for late bleeding after percutaneous coronary intervention for patients older than 65 years. *Circ Cardiovasc Interv*. 2010;3:140-147.
